# Supplementary material
Source: PubMed Central journal article supplement (PMC4114946)
Supplement: supp_tpc.113.121848_tpc121848_SupplementalData.pdf [file supp_tpc.113.121848_tpc121848_SupplementalData.pdf]

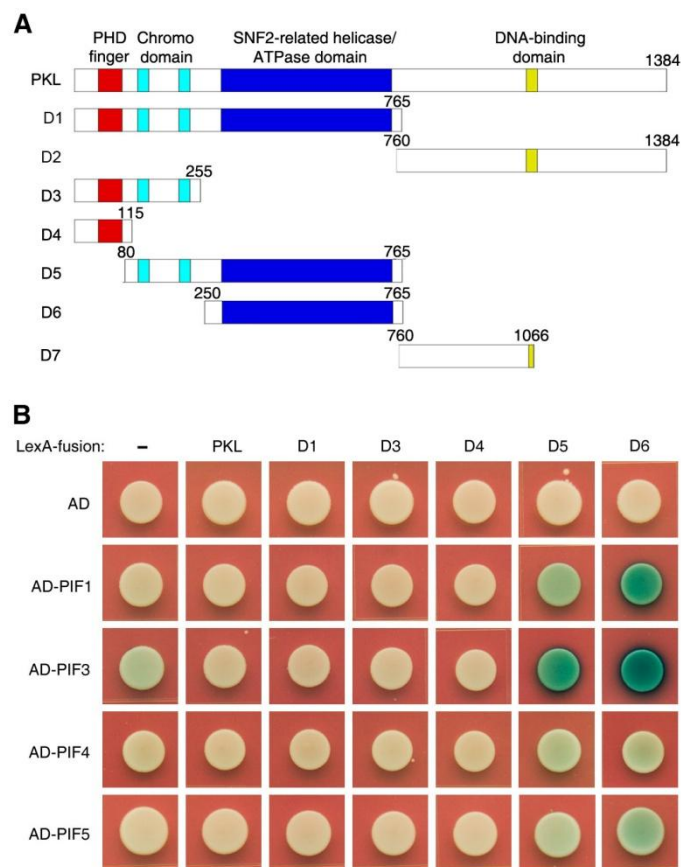

**Supplemental Figure 1. Yeast two-hybrid assay showing the interaction between PKL and PIFs.**

(A) Diagram of the domain structures of PKL and various PKL truncations (Jing et al., 2013). (B) Yeast two-hybrid analysis of AD-fused PIF1, 3, 4, or 5 and the indicated LexA-BD-tagged PKL fragments.

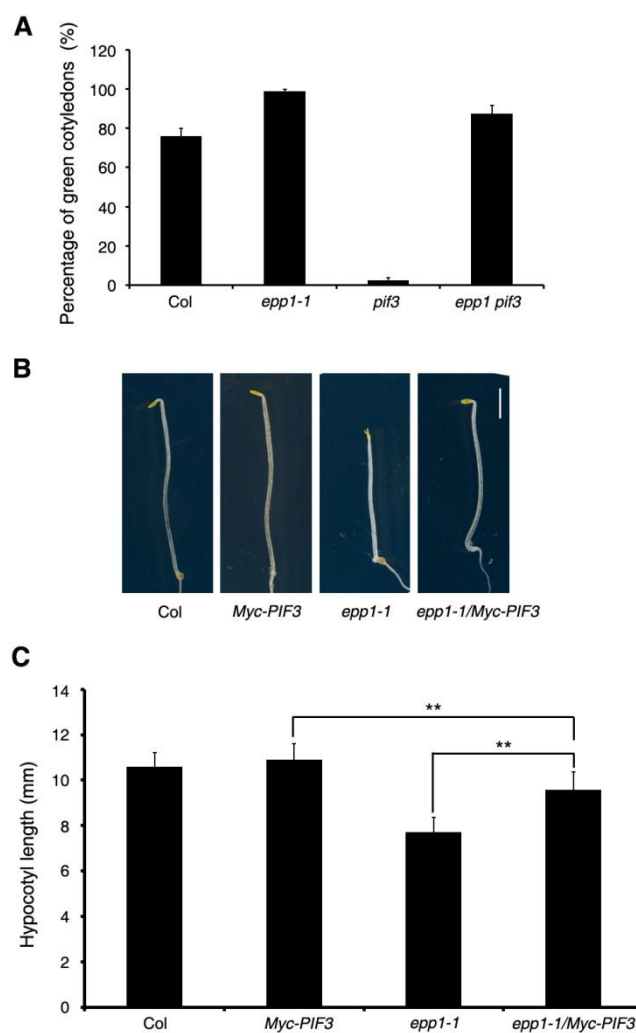

**Supplemental Figure 2. Phenotypes of *epp1 pif3* and *epp1/Myc-PIF3* plants.**

**(A)** Seedling greening phenotypes of *epp1*, *pif3*, and *epp1 pif3* mutants and the Col wild type. Six-day-old etiolated seedlings were exposed to white light ( $60 \mu\text{mol}/\text{m}^2/\text{s}$ ) for 1 d, and greening rate was determined by counting the percentage of dark-green cotyledons from 50 to 80 seedlings. **(B)** The skotomorphogenic phenotype of wild-type and *epp1* plants and *epp1* plants transformed with *Pro35S:Myc-PIF3* grown in the dark for 5 d. Bar = 2 mm. **(C)** Hypocotyl length of the seedlings shown in (A). Data represent the mean  $\pm$  SD of at least 20 seedlings. Asterisks indicate significant difference at  $P < 0.01$  using Student's *t*-test.

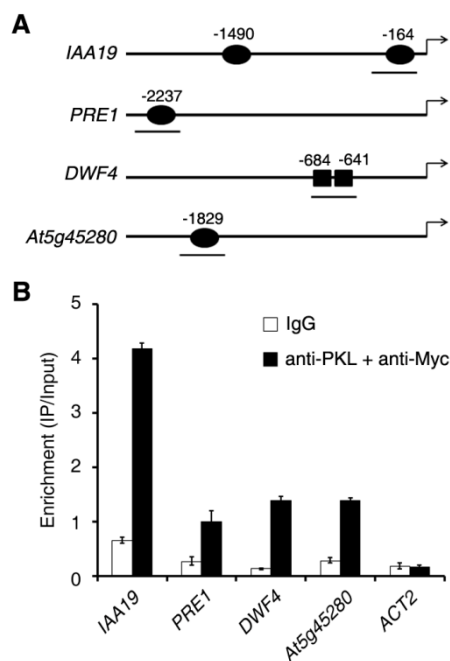

**Supplemental Figure 3. PIF3 and PKL bind to the promoters of cell elongation-related genes.**

**(A)** Promoter diagrams of four cell elongation-related genes. Arrows indicate the translation start sites of the genes. Ovals indicate the G-box (CACGTG) motif and squares denote the core sequence of the BZR1-binding site (CGTG). The positions of these motifs are labeled. The approximate regions for ChIP-qPCR are lined below the motifs. **(B)** ChIP-qPCR assay showing relative enrichment of the promoter fragments of several cell elongation-related genes pulled down sequentially by PKL and MYC antibodies in *Pro35S:Myc-PIF3* transgenic plants. Seedlings were grown in the dark for 5 d. Data represent the mean  $\pm$  SD of biological triplicates. Amplification of *ACT2* serves as a negative control.

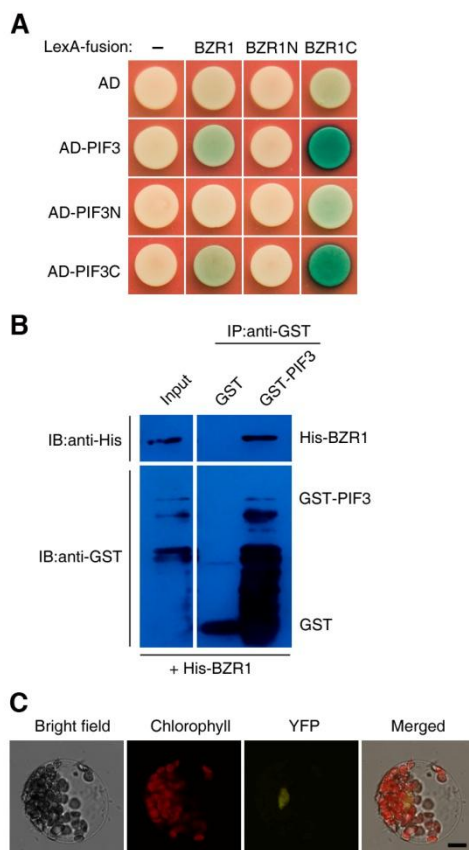

**Supplemental Figure 4. PIF3 interacts with BZR1.**

**(A)** A yeast two-hybrid assay between PIF3 and BZR1. The full-length, N- or C-termini of PIF3 and BZR1 were fused to the AD domain or LexA BD domain, respectively. PIF3N, amino acid (aa) 1-285 ; PIF3C, aa 286-524, containing the bHLH domain; BZR1N, aa 1-109, containing the DNA binding domain; and BZR1C, aa 110-336. **(B)** Pull-down assay between recombinant His-BZR1 and GST-PIF3 or GST alone. IB, immunoblot; IP, immunoprecipitation. **(C)** BiFC assay showing that YFP<sup>N</sup>-PIF3 and BZR1-YFP<sup>C</sup> interact in the nucleus. Bar = 5  $\mu$ m.

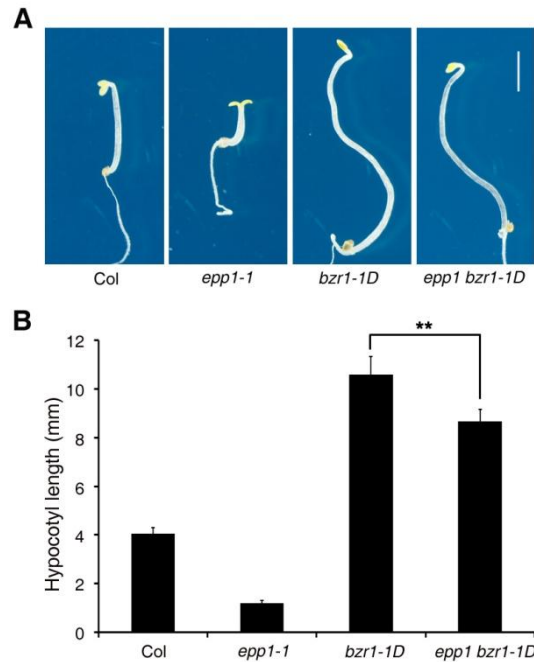

**Supplemental Figure 5. Phenotype of *epp1/bzr1-1D* plants.**

**(A)** Seedling morphology of *epp1*, *bzr1-1D*, and *epp1 bzr1-1D* mutants and the Col wild type. Plants were grown in MS medium containing 1  $\mu$ M PCZ in darkness for 5 d. Bar = 2 mm. **(B)** Hypocotyl length of seedlings as shown in (A). Data represent the mean  $\pm$  SD of at least 20 seedlings. Asterisks indicate significant difference at  $P < 0.01$  using Student's *t*-test.

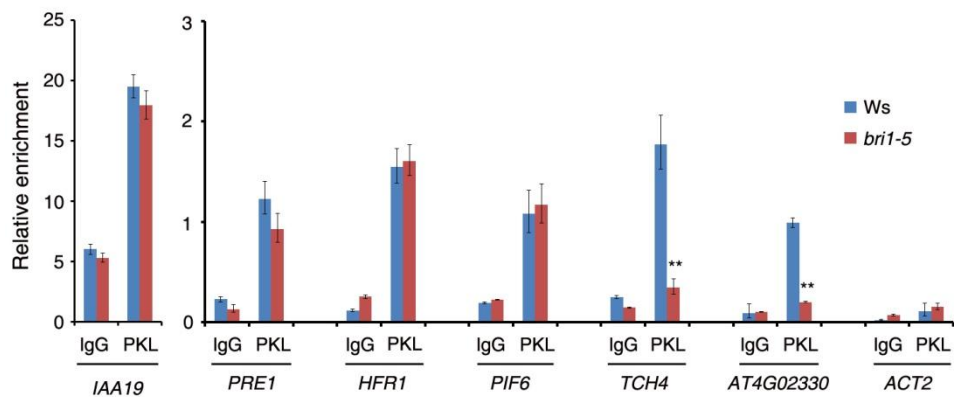

**Supplemental Figure 6. ChIP-qPCR assay in the wild type and *bri1-5* mutant.**

Ws wild type and *bri1-5* seedlings were grown in darkness for 5 d. After precipitation with PKL antibody or IgG control, the genomic fragments of various target genes were amplified by PCR. *ACT2* serves as a negative control. Data represent the mean  $\pm$  SD of three biological replicates. Asterisks indicate significant difference from the wild type at  $P < 0.01$  using Student's *t*-test.

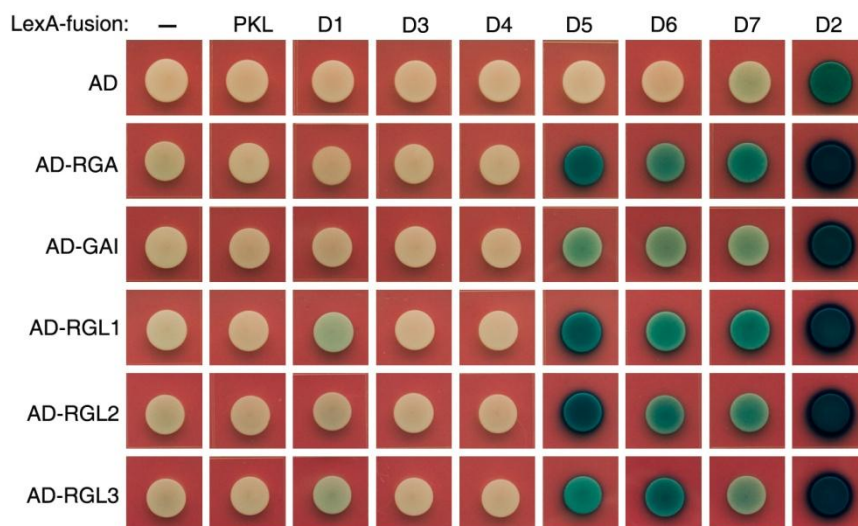

**Supplemental Figure 7. Interaction between PKL and DELLA proteins in yeast.**

Yeast two-hybrid assay between PKL and DELLAs. RGA, GAI, RGL1, RGL2 and RGL3 were fused with the activation domain, whereas different fragments of PKL were tagged with the LexA DNA-binding domain.

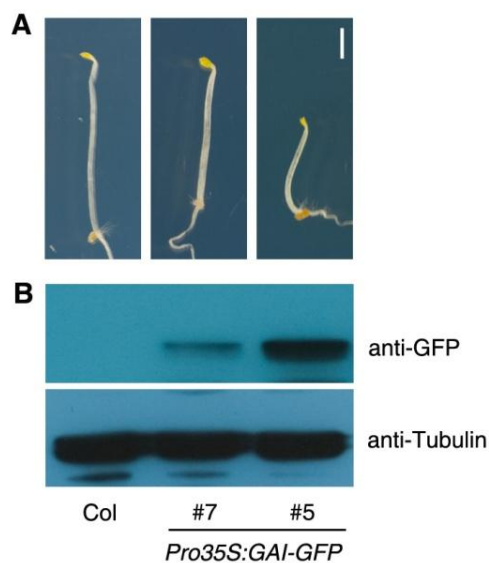

**Supplemental Figure 8. Characterization of *Pro35S:GAI-GFP* transgenic plants.** **(A)** Short hypocotyl phenotype of *GAI* overexpression plants (*Pro35S:GAI-GFP*) grown in the dark for 5 d. Two representative lines are shown and line #5 was used for further analysis. Bar = 2 mm. **(B)** Immunoblot using GFP antibody showed the expression level of the *GAI-GFP* fusion protein in the transgenic lines. Immunoblot with tubulin antibody served as an equal loading control.



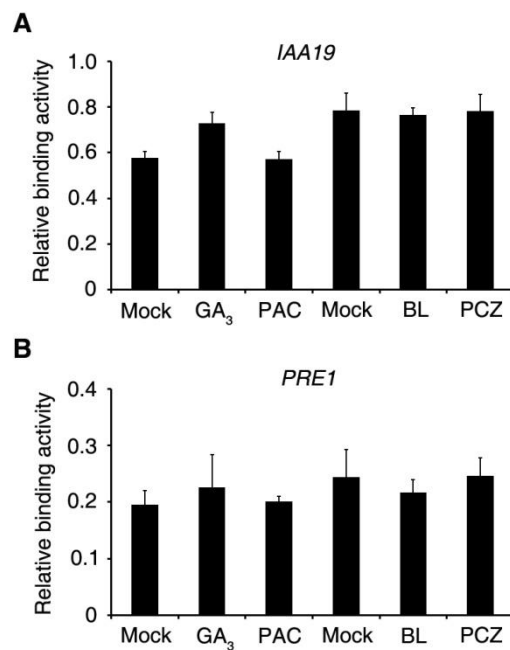

**Supplemental Figure 9. Relative binding activity of PKL to the downstream genes.**

A ChIP assay was performed as described in Figure 6C and 6D. After immunoprecipitation, the protein-DNA samples were equally divided. One set of samples was used for quantifying the amount of *IAA19* (**A**) and *PRE1* (**B**) promoter fragments by qPCR, and another one was immunoblotted with the PKL antibody. Relative binding activity is expressed as amount of DNA/ amount of PKL protein after ChIP. Data represent the mean  $\pm$  SD of three technical replicates.

**Supplemental Table 1. List of primers used in this study.**

| Gene AGI code                | Oligo name                 | Sequence (5'-3')                         | Purpose                             |
|------------------------------|----------------------------|------------------------------------------|-------------------------------------|
| <i>PKL/EPP1</i><br>AT2G25170 | EPP1/2/3-F                 | CAATTGATGAGTAGTTTGGTGGAGAG               | Cloning of PKL and its fragments    |
|                              | EPP1-R                     | GGTACCTCGAGGCTAGCTCAATCAACGACCATGTTCTTTG |                                     |
|                              | EPP1-D1-R                  | CTCGAGCTTTGATCCATACCTGATGATGTCA          |                                     |
|                              | EPP1-D2-F                  | CAATTGATGATCAGGTATGGATCAAAGGAGC          |                                     |
|                              | EPP1-D3-R                  | CTCGAGTCAATTTCTTTTATGGTCAACATCT          |                                     |
|                              | EPP1-D4-R                  | CTCGAGTCATTCCTAGATTTTGTAGGACGC           |                                     |
|                              | EPP1-D5-F                  | CAATTGATGCTTAAAGATGCTTCCGTGGAAA          |                                     |
|                              | EPP1-D6-F                  | CAATTGATGGTTGACCATAAAAGAAATCCCA          |                                     |
|                              | EPP1-D7-R                  | CTCGAGTCATCCACTTCTCAGTCCGGGGAATC         |                                     |
|                              | EPP1-Q-F                   | GAGCGAATTGATGGAAAGGT                     | qRT-PCR                             |
|                              | EPP1-Q-R                   | TTCCTAAGCCACCAGCTCTT                     |                                     |
|                              | epp1-1-F                   | CACAGTGGGAGTGAGCTTTATTG                  | Genotyping of <i>epp1-1</i>         |
|                              | epp1-1-R                   | TTCAGCAATGTTCTCCTCTCCCT                  |                                     |
| <i>PIF1</i><br>AT2G20180     | PIF1-F                     | GGTACCGAATTCATGCATCATTTTTGTCCCTGAC       | Cloning for yeast two-hybrid assays |
|                              | PIF1-R                     | GTCGACACCTGTTGTGTGGTTTCCGT               |                                     |
|                              | PIF1-Fc                    | GGTACCGAATTCATGCAAGCACGTGTATCAACAAC      |                                     |
| PIF1-Rn                      | GTCGACTTTTGTTCCTCGCTACGGGA |                                          |                                     |
| <i>PIF3</i><br>AT1G09530     | PIF3-F                     | GGTACCGAATTCATGCCTCTGTTTGAGCTTTTC        |                                     |
|                              | PIF3-R                     | CTCGAGCGACGATCCACAAAACCTGATC             |                                     |
| <i>PIF4</i><br>AT2G43010     | PIF4-F                     | GAATTCATGGAACACCAAGGTTGGAG               |                                     |
|                              | PIF4-R                     | GTCGACGTGGTCCAAACGAGAACCGTC              |                                     |
| <i>PIF5</i>                  | PIF5-F                     | GAATTCATGGAACAAGTGTGCTG                  |                                     |

|                           |                                        |                                                                                                                                          |                                        |
|---------------------------|----------------------------------------|------------------------------------------------------------------------------------------------------------------------------------------|----------------------------------------|
| AT3G59060                 | PIF5-R                                 | CTCGAGGCCTATTTTACCCATATGAAG                                                                                                              |                                        |
| <i>RGA</i><br>AT2G01570   | RGA-MfeI-F<br>RGA-SalI-R               | CAATTGATGAAGAGAGATCATCACCAATC<br>GTCGACGTACGCCGCCGTCGAGAGTTTC                                                                            |                                        |
|                           | RGA-BamHI-F<br>RGA-NotI-R              | GGATCCATGAAGAGAGATCATCACCAATC<br>GCGGCCGCGTACGCCGCCGTCGAGAGTTTC                                                                          | Recombinant protein<br>expression      |
| <i>GAI</i><br>AT1G14920   | GAI-EcoRI-F<br>GAI-SalI-R              | GAATTCATGAAGAGAGATCATCATCATC<br>GTCGACATTGGTGGAGAGTTTCCAAG                                                                               | Cloning for yeast<br>two-hybrid assays |
|                           | GAI-BamHI-F<br>GAI-NotI-R              | GGATCCATGAAGAGAGATCATCATCATC<br>GCGGCCGCATTGGTGGAGAGTTTCCAAG                                                                             | Recombinant protein<br>expression      |
| <i>BZR1</i><br>AT1G75080  | BZR1-F<br>BZR1-R<br>BZR1C-F<br>BZR1N-R | GAATTCATGACTTCGGATGGAGCTACATCGAC<br>GTCGACACCACGAGCCTTCCCATTTC<br>GGATCCGAATTCTCACAGAACCAGAGCCCTC<br>GCGGCCGCGTCTGACTGAATATGGAGTTACTCGAG | Cloning for yeast<br>two-hybrid assays |
| <i>RGL1</i><br>AT1G66350  | RGL1-F<br>RGL1-R                       | CAATTGATGAAGAGAGAGCACAACC<br>GTCGACTTCCACACGATTGATTTCGC                                                                                  | Cloning for yeast<br>two-hybrid assays |
| <i>RGL2</i><br>AT3G03450  | RGL2-F<br>RGL2-R                       | CAATTGATGAAGAGAGGATACGGAG<br>GTCGACGGCGAGTTTCCACGCCGAGG                                                                                  |                                        |
| <i>RGL3</i><br>AT5G17490  | RGL3-F<br>RGL3-R                       | CAATTGATGAAACGAAGCCATCAAG<br>GTCGACCCGCCGCAACTCCGCCGCTAG                                                                                 |                                        |
| <i>GFP</i>                | GFP-F<br><br>GFP-R                     | TCTAGAGATCTGAATTCGGATCCCTCGAGATGGGTAAAGGA<br>GAACTTTTCACTGGGATG<br>AGGCCTACTAGTTTAGATAGATCTGTATAGTTCATCCATGCC                            | pVIP-N-GFP<br>construction             |
| <i>IAA19</i><br>AT3G15540 | IAA19-Q-F<br>IAA19-Q-R                 | TTTCATCTGGTGGTGACGCT<br>CATAACCCTAACCCCACTTTTCG                                                                                          | RT-qPCR                                |
| <i>DWF4</i><br>AT3G50660  | DWF4-Q-F<br>DWF4-Q-R                   | TCCCTAGTGGGTGGAAAGTGT<br>CGCTCCGTTGTTTTGCTGTT                                                                                            |                                        |

|                           |                                      |                                                        |           |
|---------------------------|--------------------------------------|--------------------------------------------------------|-----------|
| <i>PRE1</i><br>AT5G39860  | PRE1-Q-F<br>PRE1-Q-R                 | GTTCTGATAAGGCATCAGCCTCG<br>GTTCTGATAAGGCATCAGCCTCG     | ChIP-qPCR |
| AT5G45280                 | AT5G45280-Q-F<br>AT5G45280-Q-R       | CTCAGCTTCAAACCGTTCAA<br>AAAGAACCAATCTCCAACCG           |           |
| AT2G43050                 | AT2G43050-Q-F<br>AT2G43050-Q-R       | GTTTCGATCCCATCCACGACT<br>TTTCTTGAAGGCTCTGCTCACA        |           |
| <i>UBQ1</i><br>AT3G52590  | UBQ-F<br>UBQ-R                       | TTCCTTGATGATGCTTGCTC<br>TTGACAGCTCTTGGGTGAAG           |           |
| <i>IAA19</i><br>AT3G15540 | IAA19-I2-F<br>IAA19-I2-R             | ATCTGTTCCCTTAACCACCTTGT<br>AAACCAATCCAATATCGACACG      |           |
| <i>PRE1</i><br>AT5G39860  | PRE1-CHIP-F<br>PRE1-CHIP-R           | GAGGGATAATGAGGGATTTTCG<br>CTATGTCACGTGTCACCACCATGTC    |           |
| <i>TCH4</i><br>AT5G57560  | TCH4-CHIP-F<br>TCH4-CHIP-R           | CGTGATTTCCAAAGCCAATA<br>GCGGTTCGTATAGAGGAAGG           |           |
| <i>HFR1</i><br>AT1G02340  | HFR1-CHIP-F<br>HFR1-CHIP-R           | GTCGCTCGCTAAGACACCAAC<br>ACGTGATGCCCTCGTGATGGAC        |           |
| <i>PIF6</i><br>AT3G62090  | PIF6-CHIP-F<br>PIF6-CHIP-R           | GTCTAATACTGCATACGGGT<br>GATAGGACCTACAAGGTGTTTG         |           |
| AT4G02330                 | AT4G02330-CHIP-F<br>AT4G02330-CHIP-R | TTTGGGATCTAAGAATGAGACTACA<br>TTGATCCGATCCATAATTGTTT    |           |
| <i>DWF4</i><br>AT3G50660  | DWF4-CHIP-F<br>DWF4-CHIP-R           | GGGTTTGACTGTCCAGTTCGGTAAT<br>ACCCTTAGGATATGGGAAAAGGGTG |           |
| AT5G45280                 | AT5G45280-CHIP-F<br>AT5G45280-CHIP-R | AACTTGATTCGGTGCATTTG<br>GTCCATATCAATTCGGCTCA           |           |
| <i>ACT2</i><br>AT3G18780  | ACT2-CHIP-F<br>ACT2-CHIP-R           | TCTGGATCTACTTTATTTGCTG<br>TACACAACTTCATCTAACCTT        |           |
